# Supplementary material
Source: publisher figshare collection journal article supplement (https://asha.figshare.com/articles/dataset/_/28003292)
Supplement: Supplementary file 1 [file 2]

## Supplemental Material S2. Scoring criteria for each treatment step and naming probes.

|                                                 | Outcome measure    | Scoring Criteria                                                                                                                                                                                                                  |
|-------------------------------------------------|--------------------|-----------------------------------------------------------------------------------------------------------------------------------------------------------------------------------------------------------------------------------|
| <b>Step 1:</b> Spontaneous Naming               | Response accuracy  | 1 (accurate): the target response in the target language, dialects, less than one phonemic error, plural or tense, synonyms<br>0 (inaccurate): unintelligible, cross-linguistic errors, more than one phonemic error, no response |
| <b>Step 2:</b> Feature Selection and Assignment | Response accuracy  | 1 (accurate): features accurately identified as Yes or No; assigned to the accurate feature category<br>0 (inaccurate): features inaccurately identified as Yes or No; assigned to the inaccurate feature category                |
| <b>Step 3:</b> Word Association                 | Rating scale 0 – 3 | 0: no response<br>1: response was obtained<br>2: in the target language<br>3: semantically accurate                                                                                                                               |
| <b>Step 4:</b> Feature Verification             | Response accuracy  | 1 (accurate): accurately identified as Yes or No<br>0 (inaccurate): inaccurately identified as Yes or No                                                                                                                          |
| <b>Step 5:</b> Follow-up Spontaneous Naming     | Response accuracy  | Same as Step 1                                                                                                                                                                                                                    |
| <b>Step 6:</b> Sentence Production              | Rating scale 0 – 5 | 0: no response<br>1: response was obtained<br>2: in the target language<br>3: semantically accurate<br>4: grammatically accurate<br>5: target word included                                                                       |
| Naming probes                                   | Response accuracy  | Same as Step 1                                                                                                                                                                                                                    |

*Note.* Reprinted from Li & Kiran (2023).
