# Supplementary material
Source: publisher figshare collection journal article supplement (https://asha.figshare.com/articles/dataset/_/28003292)
Supplement: Supplementary file 2 [file 2]

**Supplemental Material S1.** Treatment steps and clinician’s feedback for noun and verb treatment.

|                                                 | Noun treatment                                                                                                                                                                                            | Verb treatment                                                                                                                                                                                     |
|-------------------------------------------------|-----------------------------------------------------------------------------------------------------------------------------------------------------------------------------------------------------------|----------------------------------------------------------------------------------------------------------------------------------------------------------------------------------------------------|
| <b>Step 1.</b> Spontaneous Naming               | Name the picture followed by clinician’s feedback.                                                                                                                                                        | Name the picture followed by clinician’s feedback.                                                                                                                                                 |
| <b>Step 2.</b> Feature Selection and Assignment | a) Select non-applied features<br>b) Sort applied features into categories: (1) function, (2) characteristics, (3) physical attributes, (4) category, and (5) location, followed by clinician’s feedback. | a) Select non-applied features<br>b) Sort applied features into categories: (1) subject, (2) purpose/object, (3) physical attributes, (4) how, and (5) location, followed by clinician’s feedback. |
| <b>Step 3.</b> Word Association                 | Produce features or items associated with the target word. If no response: “think of a personal object, a person, an experience that has something in common with this word.”                             | Produce features or items associated with the target word. If no response: “think of a personal object, a person, an experience that has something in common with this word.”                      |
| <b>Step 4.</b> Feature Verification             | Verify whether given features apply to the target with Yes or No.                                                                                                                                         | Verify whether given features apply to the target with Yes or No.                                                                                                                                  |
| <b>Step 5.</b> Follow-up Spontaneous Naming     | Repeat Step 1.                                                                                                                                                                                            | Repeat Step 1.                                                                                                                                                                                     |
| <b>Step 6.</b> Sentence Production              | Create a sentence with the target word. Feedback focuses on grammaticality and semantics.                                                                                                                 | Create a sentence with the target word. Feedback focuses on grammaticality and semantics.                                                                                                          |

*Note.* Reprinted from Li & Kiran (2023).
